# Supplementary material for: Unlocking the catalytic potential of iMXenes: selective electrochemical CO2 reduction for methane production
Source: Royal Society of Chemistry journal article supplement (doi:10.1039/d4ta06307d), 2025-01-01
Supplement: d4ta06307d1.pdf [file d4ta06307d1.pdf]

**Supplementary Information**

**for**

**Unlocking the Catalytic Potential of iMXenes: Selective Electrochemical CO<sub>2</sub> Reduction  
for Methane Production**

*Rohit Anand, Mohammad Zafari, Vishal Gupta, Geunsik Lee\*, and Kwang S. Kim\**

Department of Chemistry, Ulsan National Institute of Science and Technology (UNIST), 50  
UNIST-gil, Ulsan 44919, South Korea

\*E-mail: gslee@unist.ac.kr and kimks@unist.ac.kr

Supplementary Figures:

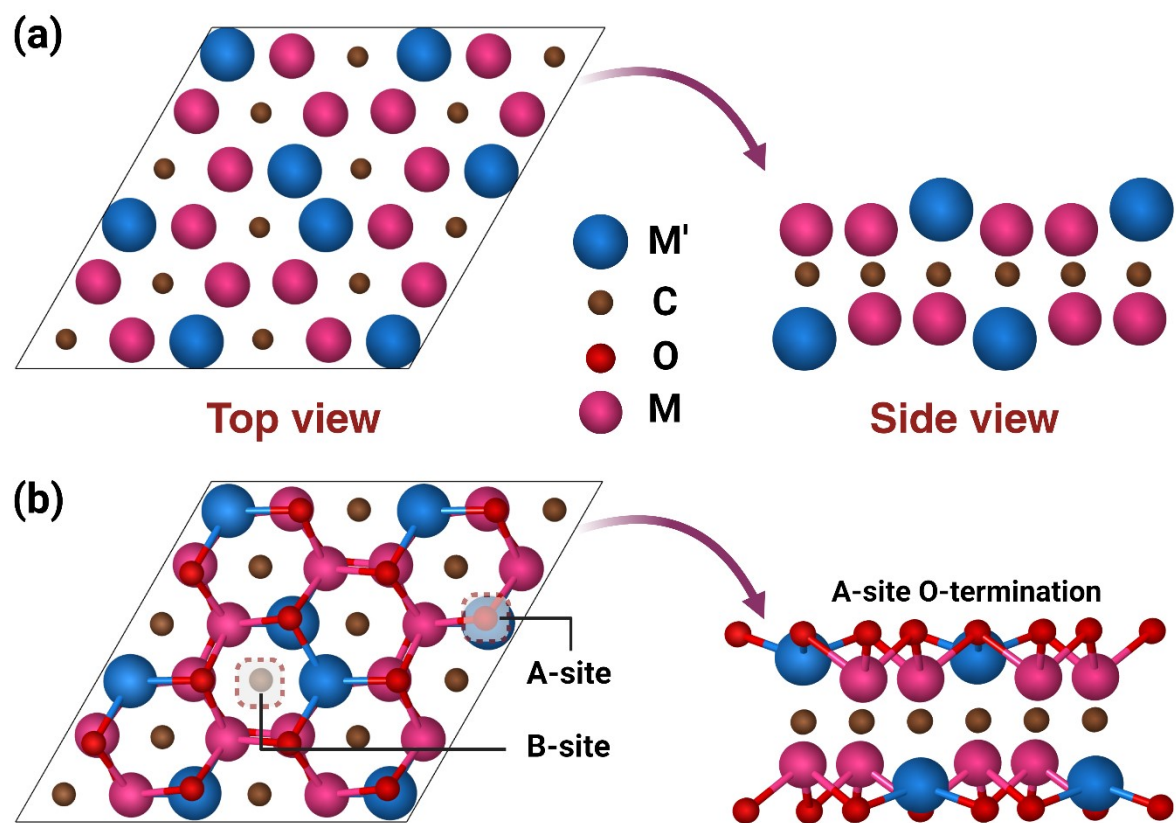

**Fig. S1** Top and side view of (a) bare and (b) O-terminated iMXenes, with two different O-termination adsorption sites (A and B site).

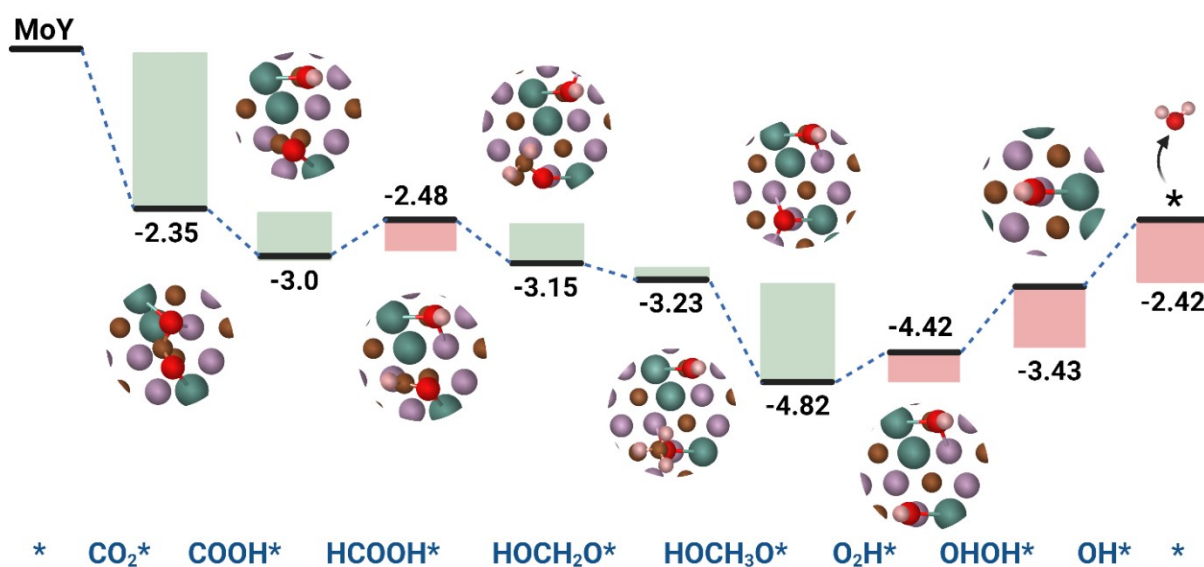

**Fig. S2** Reaction free energy diagram with minimum energy path for  $\text{CO}_2$  reduction to  $\text{CH}_4$  catalyzed by MoY, at zero applied potential (*vs.* RHE). The Gibbs free energies values are in eV. The green and red color shadings indicate the spontaneous and non-spontaneous reactions.

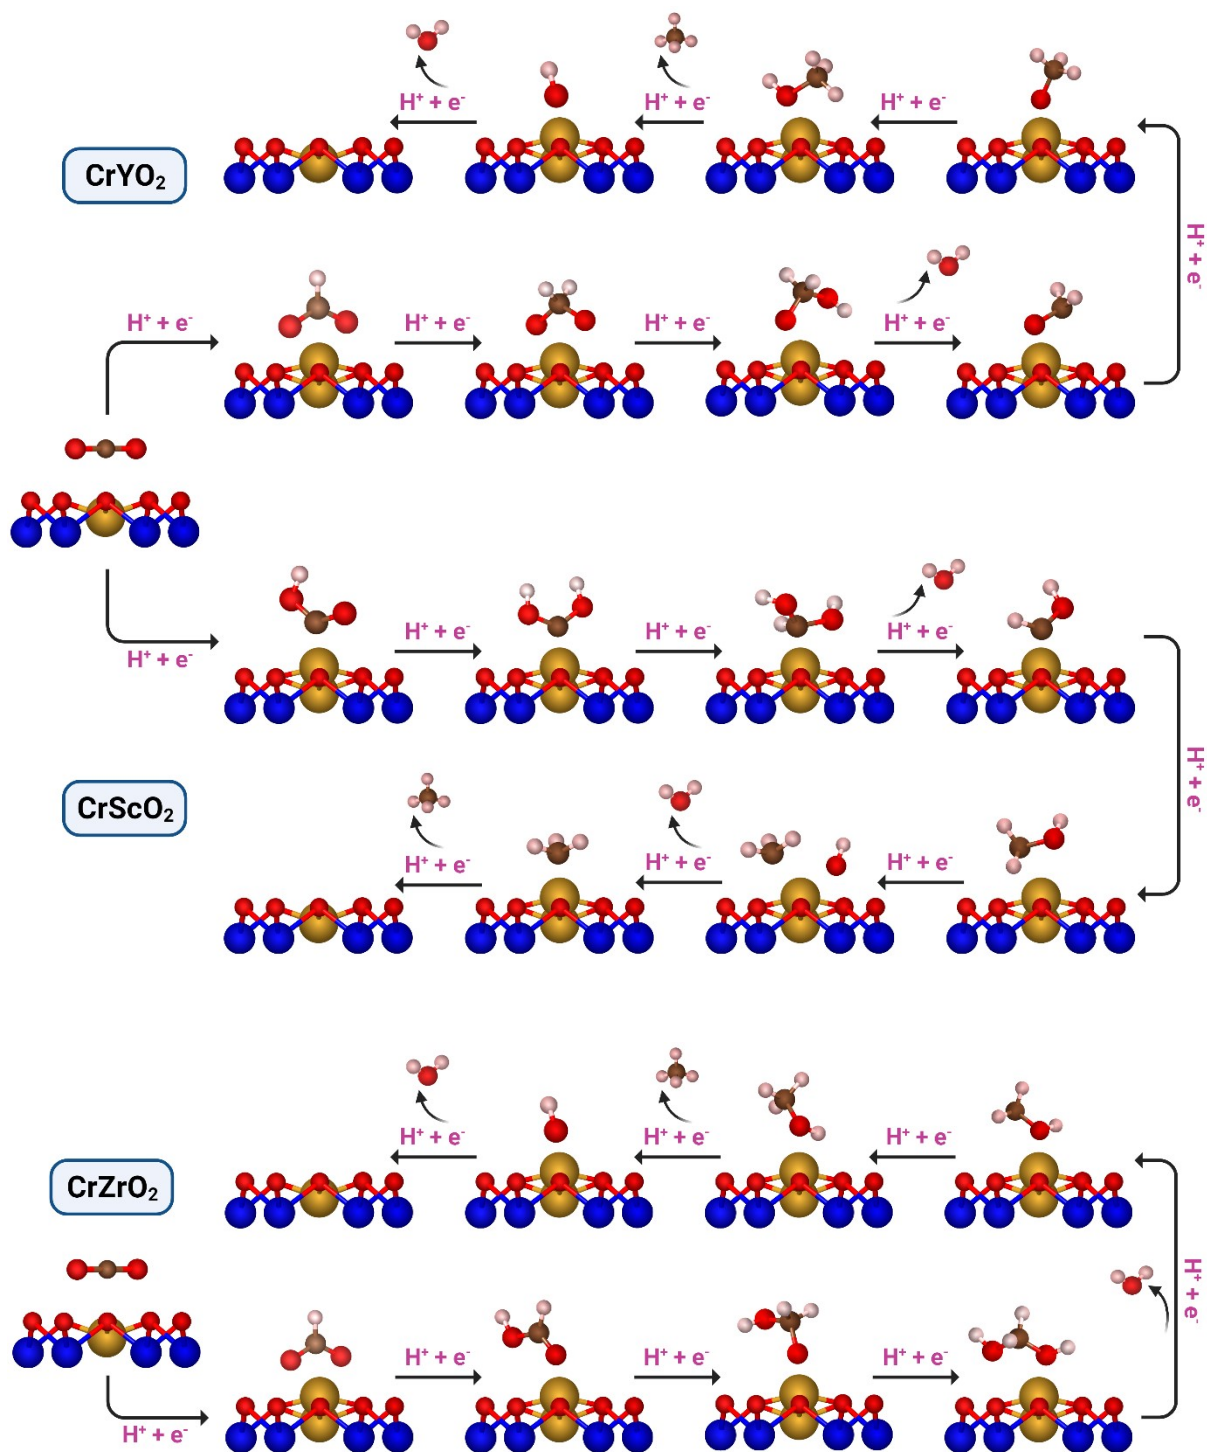

**Fig. S3** The intermediate species for minimum energy path and their corresponding mechanisms for  $\text{CrScO}_2$ ,  $\text{CrYO}_2$ , and  $\text{CrZrO}_2$ .

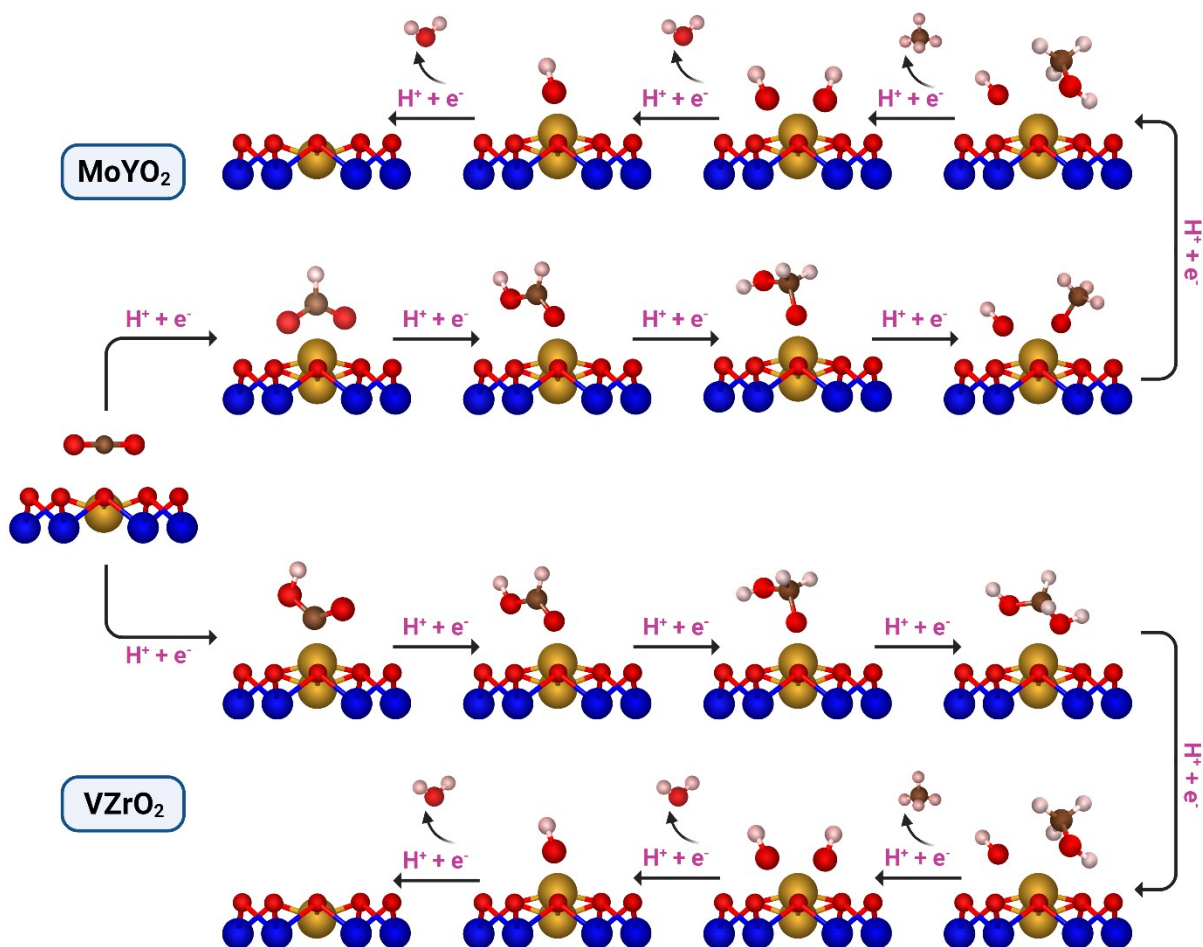

**Fig. S4** The intermediate species for minimum energy path and their corresponding mechanisms for MoYO<sub>2</sub> and VZrO<sub>2</sub>.

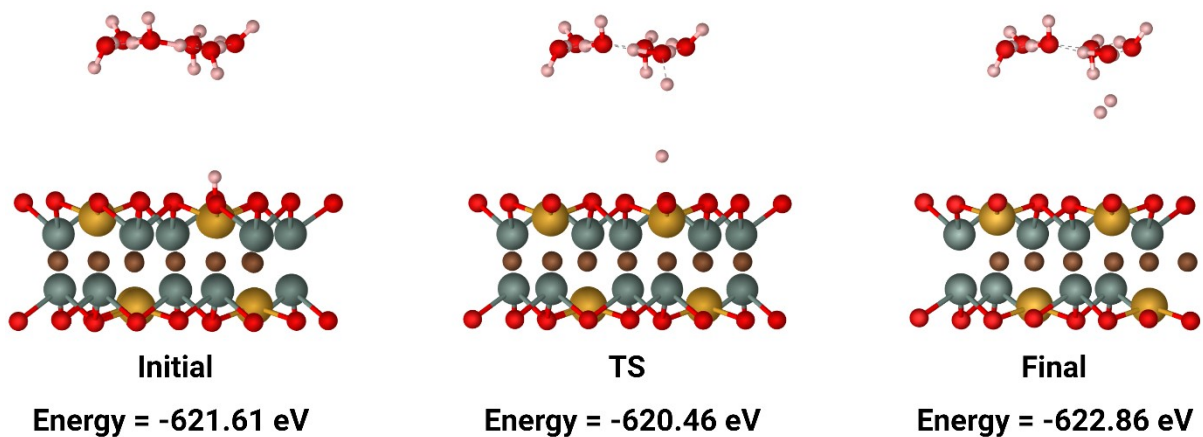

**Fig. S5** The initial, transition state (TS), and final configuration from the CI-NEB calculation performed using the explicit solvation model for H<sub>2</sub> production on the MoScO<sub>2</sub> surface.

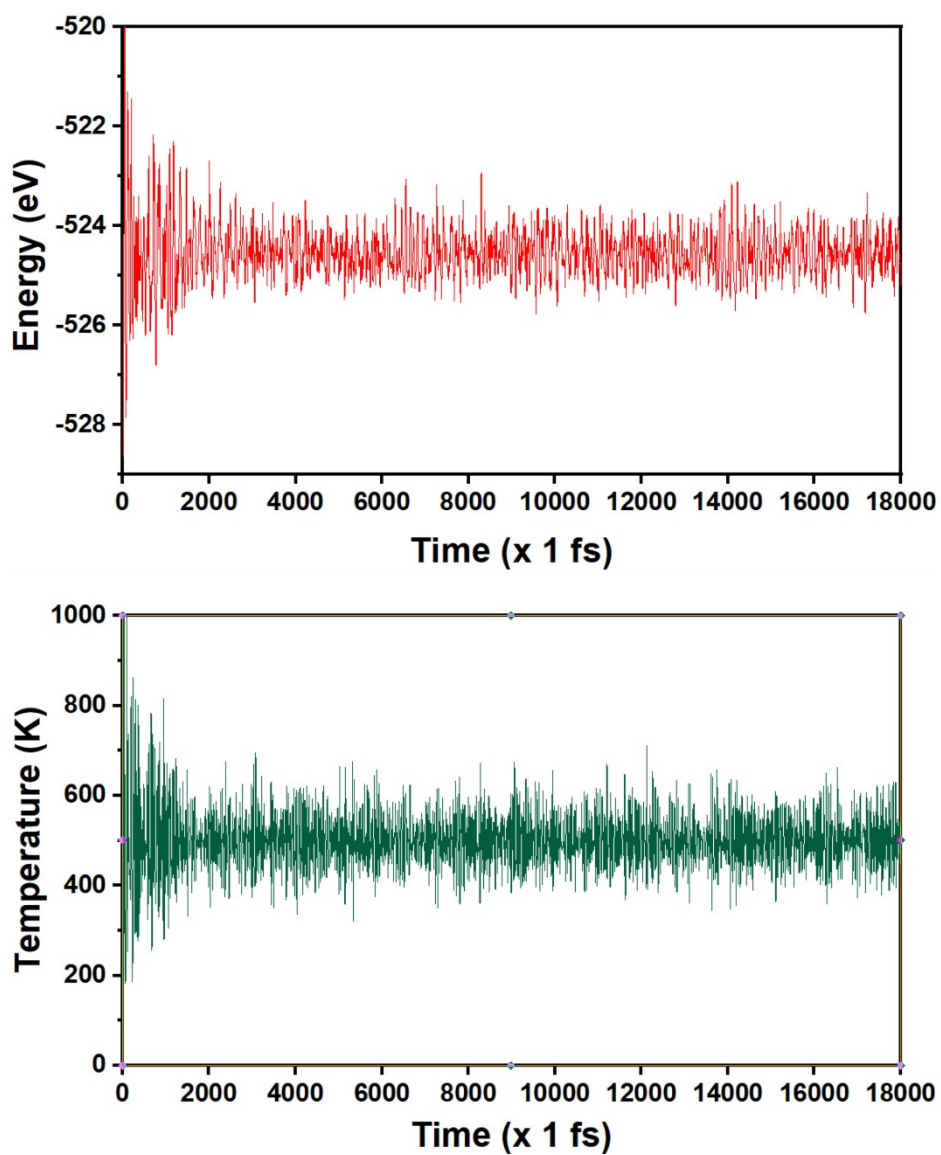

**Fig. S6** The energy and temperature changes along time in MD simulations for MoScO<sub>2</sub>. The machine learning potential are generated using on-the-fly sampling and sparse Gaussian regression (SGPR) algorithm as implemented in AUTOFORCE. The MD simulations are conducted at T=500K.

**Supplementary Tables:**

**Table S1** Geometrical parameters after CO<sub>2</sub> adsorption on both bare and O-terminated iMXenes, bond angle O-C-O, distance between surface and CO<sub>2</sub> ( $d^{\text{surf-CO}_2}$ ), distance between carbon and two oxygen atoms of CO<sub>2</sub>\* ( $d^{\text{C-O}}$ ).

| iMXenes            | O-C-O<br>(deg.) | $d^{\text{surf-CO}_2}$<br>(Å) | $d^{\text{C-O}}$ (Å) |                  |
|--------------------|-----------------|-------------------------------|----------------------|------------------|
|                    |                 |                               | C-O <sub>1</sub>     | C-O <sub>2</sub> |
| CrSc               | 116.72          | 2.06                          | 1.31                 | 1.38             |
| CrY                | 122.93          | 2.29                          | 1.33                 | 1.29             |
| CrZr               | 116.07          | 2.24                          | 1.38                 | 1.33             |
| MoSc               | 118.50          | 1.38                          | 1.39                 | 1.31             |
| MoY                | 121.10          | 1.38                          | 1.38                 | 1.31             |
| VZr                | 116.27          | 1.41                          | 1.41                 | 1.33             |
| WSc                | 131.77          | 2.23                          | 1.29                 | 1.27             |
| WY                 | 127.00          | 2.30                          | 1.26                 | 1.34             |
| CrScO <sub>2</sub> | 178.00          | 2.73                          | 1.18                 | 1.18             |
| CrYO <sub>2</sub>  | 177.00          | 2.79                          | 1.17                 | 1.19             |
| CrZrO <sub>2</sub> | 179.00          | 2.96                          | 1.18                 | 1.18             |
| MoScO <sub>2</sub> | 178.60          | 2.64                          | 1.18                 | 1.19             |
| MoYO <sub>2</sub>  | 176.80          | 2.75                          | 1.19                 | 1.17             |
| VZrO <sub>2</sub>  | 179.20          | 2.96                          | 1.18                 | 1.18             |
| WScO <sub>2</sub>  | 179.50          | 3.00                          | 1.18                 | 1.18             |
| WYO <sub>2</sub>   | 178.00          | 2.80                          | 1.19                 | 1.17             |

**Table S2** Bader charge analysis of CO<sub>2</sub> adsorbed intermediate bare and O-terminated iMXenes. C, O<sub>1</sub>, and O<sub>2</sub> are adsorbed CO<sub>2</sub> atoms. The net charge transferred to CO<sub>2</sub> is also provided.

| <b>iMXenes</b>           | <b>C</b> | <b>O<sub>1</sub></b> | <b>O<sub>2</sub></b> | <b>Net charge on CO<sub>2</sub></b> |
|--------------------------|----------|----------------------|----------------------|-------------------------------------|
| <b>CrSc</b>              | 0.71     | -1.17                | -1.16                | -1.62                               |
| <b>CrY</b>               | 0.96     | -1.20                | -1.20                | -1.44                               |
| <b>CrZr</b>              | 0.71     | -1.16                | -1.16                | -1.61                               |
| <b>MoSc</b>              | 0.76     | -1.14                | -1.18                | -1.56                               |
| <b>MoY</b>               | 0.79     | -1.16                | -1.21                | -2.02                               |
| <b>VZr</b>               | 0.54     | -1.15                | -1.17                | -1.78                               |
| <b>WSc</b>               | 0.76     | -1.15                | -1.12                | -1.51                               |
| <b>WY</b>                | 0.76     | -1.20                | -1.15                | -1.59                               |
| <b>CrScO<sub>2</sub></b> | 2.13     | -1.10                | -1.07                | -0.04                               |
| <b>CrYO<sub>2</sub></b>  | 2.17     | -1.12                | -1.12                | -0.07                               |
| <b>CrZrO<sub>2</sub></b> | 2.13     | -1.07                | -1.09                | -0.03                               |
| <b>MoScO<sub>2</sub></b> | 2.06     | -1.12                | -1.04                | -0.10                               |
| <b>MoYO<sub>2</sub></b>  | 2.11     | -1.10                | -1.05                | -0.04                               |
| <b>VZrO<sub>2</sub></b>  | 2.14     | -1.08                | -1.09                | -0.03                               |
| <b>WScO<sub>2</sub></b>  | 2.12     | -1.07                | -1.08                | -0.03                               |
| <b>WYO<sub>2</sub></b>   | 2.14     | -1.12                | -1.07                | -0.05                               |



**Table S3** DFT based calculated electronic energies ( $E_{\text{elec}}$ ), zero-point energies (ZPE), and entropy contributions (TS) for the gaseous molecules in eV.

| Species            | $E_{\text{elec}}$ (eV) | ZPE (eV) | -TS (eV) |
|--------------------|------------------------|----------|----------|
| CO <sub>2</sub>    | -22.26                 | 0.30     | -0.21    |
| CO                 | -14.42                 | 0.13     | -0.62    |
| HCOOH              | -29.20                 | 0.90     | -0.48    |
| CH <sub>3</sub> OH | -29.92                 | 1.34     | -0.82    |
| CH <sub>4</sub>    | -24.04                 | 1.31     | -0.46    |
| H <sub>2</sub> O   | -14.22                 | 0.55     | -0.62    |
| 0.5 H <sub>2</sub> | -3.38                  | 0.14     | -0.20    |

**Table S4** The adsorption Gibbs free energies change ( $\Delta G_{\text{ad}}$ ) for CO<sub>2</sub> and H<sub>2</sub>O adsorption on both bare and O-terminated iMXenes in eV.

| iMXenes            | $\Delta G_{\text{CO}_2^*}$ | $\Delta G_{\text{H}_2\text{O}^*}$ |
|--------------------|----------------------------|-----------------------------------|
| CrSc               | -3.63                      | -1.59                             |
| CrY                | -2.77                      | -0.75                             |
| CrZr               | -3.23                      | -0.63                             |
| MoSc               | -2.19                      | -0.31                             |
| MoY                | -2.36                      | -0.29                             |
| VZr                | -2.77                      | -0.42                             |
| WSc                | -1.77                      | -0.28                             |
| WY                 | -2.19                      | -0.27                             |
| CrScO <sub>2</sub> | -1.10                      | -0.38                             |
| CrYO <sub>2</sub>  | -1.23                      | -0.90                             |
| CrZrO <sub>2</sub> | -0.33                      | -0.08                             |
| MoScO <sub>2</sub> | -0.25                      | -0.09                             |
| MoYO <sub>2</sub>  | -0.45                      | -0.12                             |
| VZrO <sub>2</sub>  | -0.33                      | -0.10                             |
| WScO <sub>2</sub>  | -0.81                      | -1.01                             |

|                        |       |       |
|------------------------|-------|-------|
| <b>WYO<sub>2</sub></b> | -0.40 | -0.09 |
|------------------------|-------|-------|

**Table S5** The Gibbs free energies change ( $\Delta G$ ) for each hydrogenation step for CO<sub>2</sub> reduction to CH<sub>4</sub>. The potential determining step (PDS) are represented in bold for both bare and O-terminated iMXenes in eV. The 1<sup>st</sup>, 2<sup>nd</sup> and so on to 8<sup>th</sup> represents the hydrogenation steps.

| <b>iMXenes</b>           | <b>1<sup>st</sup></b> | <b>2<sup>nd</sup></b> | <b>3<sup>rd</sup></b> | <b>4<sup>th</sup></b> | <b>5<sup>th</sup></b> | <b>6<sup>th</sup></b> | <b>7<sup>th</sup></b> | <b>8<sup>th</sup></b> |
|--------------------------|-----------------------|-----------------------|-----------------------|-----------------------|-----------------------|-----------------------|-----------------------|-----------------------|
| <b>CrSc</b>              | -0.46                 | 1.29                  | -0.27                 | -1.91                 | 0.19                  | -2.46                 | 1.49                  | <b>1.92</b>           |
| <b>CrY</b>               | 0.17                  | -0.41                 | 0.45                  | -0.09                 | -0.07                 | -1.78                 | 0.45                  | <b>1.85</b>           |
| <b>CrZr</b>              | -0.36                 | 0.32                  | -0.04                 | -0.06                 | -2.14                 | 0.57                  | 0.83                  | <b>1.78</b>           |
| <b>MoSc</b>              | -0.89                 | 0.33                  | -0.31                 | -0.83                 | -1.61                 | 0.51                  | 1.15                  | <b>1.52</b>           |
| <b>MoY</b>               | -0.64                 | 0.52                  | -0.67                 | -0.08                 | -1.59                 | 0.40                  | 0.99                  | <b>1.01</b>           |
| <b>VZr</b>               | -0.84                 | -0.02                 | -0.19                 | -0.55                 | -1.80                 | 0.24                  | 1.98                  | <b>1.63</b>           |
| <b>WSc</b>               | -0.43                 | -1.29                 | -1.98                 | 0.35                  | 0.02                  | 0.59                  | 0.96                  | <b>1.37</b>           |
| <b>WY</b>                | -0.76                 | -0.25                 | 0.15                  | -0.86                 | -0.09                 | -0.38                 | <b>1.04</b>           | 1.00                  |
| <b>CrScO<sub>2</sub></b> | -0.66                 | 0.54                  | -0.13                 | -0.37                 | -0.32                 | <b>0.77</b>           | -0.35                 | 0.24                  |
| <b>CrYO<sub>2</sub></b>  | -0.75                 | 1.36                  | -0.63                 | -2.03                 | <b>1.6</b>            | 0.04                  | -1.19                 | 0.26                  |
| <b>CrZrO<sub>2</sub></b> | <b>0.53</b>           | -0.12                 | 0.26                  | -0.5                  | -0.31                 | -1.34                 | -0.03                 | -0.28                 |
| <b>MoScO<sub>2</sub></b> | -0.09                 | 0.21                  | <b>0.27</b>           | -0.41                 | -0.5                  | -0.31                 | -0.8                  | -0.23                 |
| <b>MoYO<sub>2</sub></b>  | -0.23                 | 0.68                  | 0.07                  | -0.62                 | -0.23                 | -0.94                 | -0.13                 | <b>0.75</b>           |
| <b>VZrO<sub>2</sub></b>  | 0.44                  | -0.55                 | <b>0.61</b>           | -0.26                 | -0.76                 | -0.6                  | -0.51                 | -0.16                 |
| <b>WScO<sub>2</sub></b>  | -0.14                 | <b>0.89</b>           | 0.01                  | -0.11                 | -0.8                  | -0.04                 | -1.13                 | -0.02                 |
| <b>WYO<sub>2</sub></b>   | -0.79                 | <b>1.21</b>           | -0.12                 | 0.01                  | -0.9                  | -0.09                 | -1.13                 | 0.09                  |

**Table S6** The Gibbs free energies change ( $\Delta G$ ) for CO<sub>2</sub> reduction to CO. The 1<sup>st</sup> and 2<sup>nd</sup> represents the first and second hydrogenation step for bare iMXenes in eV. The PDS of the reaction is shown in bold. All values are in eV.

| iMXenes | 1 <sup>st</sup> | 2 <sup>nd</sup> | CO <sup>desorption</sup> |
|---------|-----------------|-----------------|--------------------------|
| CrSc    | -0.46           | 1.29            | <b>2.66</b>              |
| CrY     | 0.17            | -0.41           | <b>2.89</b>              |
| CrZr    | -0.36           | -               | <b>2.25</b>              |
| MoSc    | -0.89           | -               | <b>2.00</b>              |
| MoY     | -0.64           | -               | <b>2.35</b>              |
| VZr     | -0.84           | -               | <b>2.42</b>              |
| WY      | -0.76           | -               | <b>1.01</b>              |

**Table S7** The Gibbs free energies change ( $\Delta G$ ) for CO<sub>2</sub> reduction to HCOOH. The 1<sup>st</sup> and 2<sup>nd</sup> represent the first and second hydrogenation step for the O-terminated iMXenes which form HCOOH\* intermediate. The PDS of the reaction is shown in bold. All values are in eV.

| iMXenes            | 1 <sup>st</sup> | 2 <sup>nd</sup> (HCOOH*) | HCOOH<br>desorption |
|--------------------|-----------------|--------------------------|---------------------|
| CrZrO <sub>2</sub> | <b>0.53</b>     | -0.12                    | 0.19                |
| MoScO <sub>2</sub> | -0.09           | 0.21                     | <b>0.51</b>         |
| MoYO <sub>2</sub>  | -0.23           | <b>0.68</b>              | 0.28                |
| VZrO <sub>2</sub>  | 0.44            | -0.55                    | <b>0.70</b>         |
| WScO <sub>2</sub>  | -0.14           | <b>0.89</b>              | 0.33                |
| WYO <sub>2</sub>   | -0.79           | <b>1.21</b>              | 0.25                |

**Table S8** The Gibbs free energies change ( $\Delta G$ ) for CO<sub>2</sub> reduction to CH<sub>3</sub>OH. The 5<sup>th</sup> and 6<sup>th</sup> represent the fifth and sixth hydrogenation step for the O-terminated iMXenes which form CH<sub>3</sub>OH\* intermediate. The PDS of the reaction is shown in bold. All values are in eV.

| iMXenes            | 5 <sup>th</sup> | 6 <sup>th</sup> (CH <sub>3</sub> OH*) | CH <sub>3</sub> OH desorption | PDS                    |
|--------------------|-----------------|---------------------------------------|-------------------------------|------------------------|
| CrYO <sub>2</sub>  | 1.6             | 0.04                                  | 0.74                          | 5 <sup>th</sup> (1.6)  |
| CrZrO <sub>2</sub> | -0.31           | -1.34                                 | 0.88                          | desorp (0.88)          |
| MoScO <sub>2</sub> | -0.5            | -0.31                                 | 0.37                          | desorp (0.37)          |
| WScO <sub>2</sub>  | -0.8            | -0.04                                 | 0.08                          | 2 <sup>nd</sup> (0.89) |
| WYO <sub>2</sub>   | -0.9            | -0.09                                 | 0.16                          | 2 <sup>nd</sup> (1.21) |
|                    | 5 <sup>th</sup> | CH <sub>3</sub> OH desorption         | 6 <sup>th</sup>               | PDS                    |
| MoYO <sub>2</sub>  | -0.23           | -0.05                                 | -0.94                         | 2 <sup>nd</sup> (0.68) |
| VZrO <sub>2</sub>  | -0.76           | -0.09                                 | -0.60                         | 3 <sup>rd</sup> (0.61) |

**Table S9** Hydrogen adsorption free energies ( $\Delta G_{H^*}$  in eV) for both bare and O-terminated iMXenes.

| <b>iMXenes</b>           | <b><math>\Delta G_{H^*}</math></b> |
|--------------------------|------------------------------------|
| <b>CrSc</b>              | -0.95                              |
| <b>CrY</b>               | 0.98                               |
| <b>CrZr</b>              | 0.43                               |
| <b>MoSc</b>              | -0.92                              |
| <b>MoY</b>               | -0.91                              |
| <b>VZr</b>               | -1.04                              |
| <b>WSc</b>               | -0.87                              |
| <b>WY</b>                | -0.87                              |
| <b>CrScO<sub>2</sub></b> | -0.93                              |
| <b>CrYO<sub>2</sub></b>  | -1.40                              |
| <b>CrZrO<sub>2</sub></b> | -0.21                              |
| <b>MoScO<sub>2</sub></b> | -0.29                              |
| <b>MoYO<sub>2</sub></b>  | -0.35                              |
| <b>VZrO<sub>2</sub></b>  | -0.39                              |
| <b>WScO<sub>2</sub></b>  | 0.35                               |
| <b>WYO<sub>2</sub></b>   | 0.48                               |

**Table S10** First hydrogen adsorption energies ( $\Delta E_{\text{ad}}$  in eV).  $\Delta E_{\text{ad-CO}_2\text{H}^*}$  represents H-adsorption on adsorbed  $\text{CO}_2$  and  $\Delta G_{\text{ad-surf}^*}$  represents H-adsorption on the surface with  $\text{CO}_2^*$ .

| <b>iMXenes</b>           | <b><math>\Delta E_{\text{ad-CO}_2\text{H}^*}</math></b> | <b><math>\Delta E_{\text{ad-surf}^*}</math></b> |
|--------------------------|---------------------------------------------------------|-------------------------------------------------|
| <b>CrScO<sub>2</sub></b> | -1.28                                                   | -1.21                                           |
| <b>CrYO<sub>2</sub></b>  | -1.08                                                   | -0.79                                           |
| <b>CrZrO<sub>2</sub></b> | 0.20                                                    | -0.62                                           |
| <b>MoScO<sub>2</sub></b> | -0.66                                                   | -0.43                                           |
| <b>MoYO<sub>2</sub></b>  | -0.57                                                   | -0.39                                           |
| <b>VZrO<sub>2</sub></b>  | -0.06                                                   | -0.75                                           |
| <b>WScO<sub>2</sub></b>  | -0.48                                                   | -0.15                                           |
| <b>WYO<sub>2</sub></b>   | -1.13                                                   | -0.45                                           |

**Table S11** Adsorption free energies for  $\text{H}_2\text{O}$  adsorption ( $* + \text{H}_2\text{O} \rightarrow \text{H}_2\text{O}^*$ ) and OH adsorption ( $\text{H}_2\text{O}^* \rightarrow \text{OH}^* + \text{H}^+ + \text{e}^-$ ) on O-terminated iMXenes, depicted as  $\Delta G_{\text{H}_2\text{O}^*}$  and  $\Delta G_{\text{OH}^*}$  (in eV), respectively.

| <b>iMXenes</b>           | <b><math>\Delta G_{\text{H}_2\text{O}^*}</math></b> | <b><math>\Delta G_{\text{OH}^*}</math></b> |
|--------------------------|-----------------------------------------------------|--------------------------------------------|
| <b>CrScO<sub>2</sub></b> | -0.38                                               | 0.83                                       |
| <b>CrYO<sub>2</sub></b>  | -0.90                                               | 0.18                                       |
| <b>CrZrO<sub>2</sub></b> | -0.08                                               | 0.40                                       |
| <b>MoScO<sub>2</sub></b> | -0.09                                               | 0.36                                       |
| <b>MoYO<sub>2</sub></b>  | -0.12                                               | 0.39                                       |
| <b>VZrO<sub>2</sub></b>  | -0.10                                               | 0.18                                       |
| <b>WScO<sub>2</sub></b>  | -1.01                                               | 0.05                                       |
| <b>WYO<sub>2</sub></b>   | -0.09                                               | 0.06                                       |

**Table S12** The free energies (eV) of each reaction step for MoY and MoScO<sub>2</sub> incorporating the solvation corrections using the implicit solvent model.

| Hydrogenation Step | MoY   | MoScO <sub>2</sub> |
|--------------------|-------|--------------------|
| 1                  | -0.74 | -0.65              |
| 2                  | 0.61  | 0.26               |
| 3                  | -0.49 | 0.29               |
| 4                  | -0.07 | -0.75              |
| 5                  | -0.11 | -0.82              |
| 6                  | 0.58  | 0.03               |
| 7                  | 0.87  | -1.08              |
| 8                  | 0.96  | -0.08              |

**Table S13** The adsorption energy ( $E_{ad}$  in eV) per terminated O-atom for both possible O-termination configurations (A and B site).

| iMXenes            | A-site | B-site |
|--------------------|--------|--------|
| CrScO <sub>2</sub> | -2.55  | -2.14  |
| CrYO <sub>2</sub>  | -3.97  | -3.55  |
| CrZrO <sub>2</sub> | -3.81  | -3.59  |
| MoScO <sub>2</sub> | -4.38  | -3.72  |
| MoYO <sub>2</sub>  | -4.74  | -4.27  |
| VZrO <sub>2</sub>  | -2.88  | -2.48  |
| WScO <sub>2</sub>  | -4.34  | -4.00  |
| WYO <sub>2</sub>   | -4.73  | -4.42  |

**Table S14** The electronic energies (eV) for CO<sub>2</sub>RR of each stable intermediate for MoY and MoScO<sub>2</sub>, with corresponding images provided in the above figures. To calculate the free energies of each step, the energies of gaseous molecules from Table S3 should be included or subtracted accordingly.

| <b>Hydrogenation Step</b> | <b>MoY</b> | <b>MoScO<sub>2</sub></b> |
|---------------------------|------------|--------------------------|
| <b>Pristine</b>           | -320.18    | -530.65                  |
| <b>*CO<sub>2</sub></b>    | -344.78    | -553.15                  |
| <b>1</b>                  | -349.13    | -556.96                  |
| <b>2</b>                  | -352.27    | -560.56                  |
| <b>3</b>                  | -356.53    | -563.99                  |
| <b>4</b>                  | -360.35    | -568.17                  |
| <b>5</b>                  | -341.11    | -572.19                  |
| <b>6</b>                  | -344.42    | -561.52                  |
| <b>7</b>                  | -332.36    | -541.42                  |
| <b>8</b>                  | -335.23    | -544.87                  |

**Table S15** The electronic energies (eV) of both pristine and \*H adsorbed intermediate for both bare and O-terminated iMXenes.

| <b>iMXenes</b> | <b>Bare</b> |           | <b>O-terminated</b> |           |
|----------------|-------------|-----------|---------------------|-----------|
|                | <b>pris</b> | <b>*H</b> | <b>Pris</b>         | <b>*H</b> |
| <b>CrSc</b>    | -311.23     | -315.82   | -520.76             | -525.33   |
| <b>CrY</b>     | -299.10     | -301.75   | -500.25             | -505.28   |
| <b>CrZr</b>    | -313.93     | -317.14   | -520.23             | -524.07   |
| <b>MoSc</b>    | -318.02     | -322.58   | -530.65             | -534.57   |
| <b>MoY</b>     | -320.18     | -324.72   | -531.28             | -535.26   |
| <b>VZr</b>     | -313.60     | -318.27   | -531.62             | -535.64   |
| <b>WSc</b>     | -345.11     | -349.61   | -563.64             | -566.92   |



|           |         |         |         |         |
|-----------|---------|---------|---------|---------|
| <b>WY</b> | -346.63 | -351.13 | -564.43 | -567.58 |
|-----------|---------|---------|---------|---------|
